# Supplementary material
Source: HighWire-hosted journal article supplement (https://cmaj.ca/highwire/filestream/59118/field_highwire_adjunct_files/0/five-moayedi-1-at.pdf)
Supplement: five-moayedi-1-at.pdf [file five-moayedi-1-at.pdf]

## Appendix 1: References

1. McKelvie RS, Moe GW, Ezekowitz JA, et al. The 2012 Canadian Cardiovascular Society heart failure management guidelines update: focus on acute and chronic heart failure. *Can J Cardiol* 2013;29:168-81.
2. Yancy CW, Jessum M, Bozkurt B, et al. ACCF/AHA guideline for the management of heart failure. *Circulation* 2013;128:e240-327.
3. Willenheimer R, van Veldhuisen DJ, Silke B, et al. Effect on survival and hospitalization of initiating treatment for chronic heart failure with bisoprolol followed by enalapril, as compared with the opposite sequence: results of the randomized Cardiac Insufficiency Bisoprolol Study (CIBIS) III. *Circulation* 2005;112:2426-35.
4. McMurray JJ, Packer M, Desai AS, et al. Angiotensin-neprilysin inhibition versus enalapril in heart failure. *N Engl J Med* 2014 Aug 30. [Epub ahead of print].
5. Brown IJ, Tzoulaki I, Candeias V, et al. Salt intakes around the world: implications for public health. *Int J Epidemiol* 2009;38:791-813.
6. Moe GW, Ezekowitz JA, O'Meara E, et al. The 2013 Canadian Cardiovascular Society heart failure management guidelines update: focus on rehabilitation and exercise and surgical coronary revascularization. *Can J Cardiol* 2014;30:249-63.
